# Supplementary material for: Health Care Utilization Patterns Among High-Cost VA Patients With Mental Health Conditions
Source: Atypon-hosted journal article supplement (doi:10.1176/appi.ps.201400286), 2015-05-01
Supplement: appi.ps.201400286.ds001.pdf [file appi.ps.201400286.ds001.pdf]

## Supplementary Appendix

**Appendix Table 1. ICD-9 diagnostic codes used to identify medical and mental health conditions.**

| Conditions                          | ICD-9 Codes                                                                                                                                                                                                                                           |
|-------------------------------------|-------------------------------------------------------------------------------------------------------------------------------------------------------------------------------------------------------------------------------------------------------|
| Circulatory                         |                                                                                                                                                                                                                                                       |
| Hypertension                        | 36211; 4372; 401; 402; 403; 404; 405; 642                                                                                                                                                                                                             |
| Ischemic Heart Disease              | 410; 411; 412; 413; 414                                                                                                                                                                                                                               |
| Congestive Heart Failure            | 39891; 40201; 40211; 40291; 40401; 40403; 40411; 40413; 40491; 40493; 428                                                                                                                                                                             |
| Peripheral Vascular Disease         | 441; 443                                                                                                                                                                                                                                              |
| Stroke                              | 430; 431; 432; 43301; 43311; 43321; 43331; 43381; 43391; 434; 435; 436; 437 (except 4372); 438                                                                                                                                                        |
| Endocrine                           |                                                                                                                                                                                                                                                       |
| Diabetes                            | 249; 250; 648; 3620; 3572; 36641; v4585; v5391                                                                                                                                                                                                        |
| Thyroid Disorder                    | 240; 246; 7945                                                                                                                                                                                                                                        |
| Musculoskeletal                     |                                                                                                                                                                                                                                                       |
| Lower Back Pain                     | 72142; 72293; 72402; 7242; 7243; 73720; 73721; 73722; 73729; 73742; 7393; 8472; 7201; 7202; 7246; 7394; 8461; 8462; 8463; 8468; 8469; 8473; 72470; 72471; 72479; 8474; 72251; 7244; 7245; 7213; 72210; 72232; 72252; 72273; 72283; 75611; 75612; 8460 |
| Arthritis                           | 711; 712; 713; 714; 715; 716                                                                                                                                                                                                                          |
| Osteoporosis                        | 7330                                                                                                                                                                                                                                                  |
| Genitourinary                       |                                                                                                                                                                                                                                                       |
| Chronic Renal Failure               | 584; 585; 586; E8791; V451; V560; V561; V568                                                                                                                                                                                                          |
| Benign Prostatic Hyperplasia        | 600                                                                                                                                                                                                                                                   |
| Urinary Incontinence                | 3076; 5951; 6256; 7881; 7882; 7883; 7884; 7886; 7889                                                                                                                                                                                                  |
| Cancer                              | 14; 15; 16; 18; 20 ;170; 171; 172; 173; 174; 175; 176; 179; 190; 191; 192; 193; 194; 195; 196; 197; 198; 199; 230; 231; 232; 233; 234                                                                                                                 |
| Respiratory                         |                                                                                                                                                                                                                                                       |
| Chronic Obstructive Pulm Disease    | 4912; 4932; 491; 492; 494; 496                                                                                                                                                                                                                        |
| Asthma                              | 493                                                                                                                                                                                                                                                   |
| Nervous System/Sense Organs         |                                                                                                                                                                                                                                                       |
| Parkinson's Disease                 | 332; 3330; 9482                                                                                                                                                                                                                                       |
| Multiple Sclerosis                  | 340                                                                                                                                                                                                                                                   |
| Vision Problem                      | 367; 368; 369; V410                                                                                                                                                                                                                                   |
| Hearing Problem                     | 38801; 38802; 3881; 3885; 389; V412; V413; V532; V721                                                                                                                                                                                                 |
| Gastrointestinal                    |                                                                                                                                                                                                                                                       |
| Acid Related Disorders              | 531; 532; 533; 534; 5301; 5302; 5350; 53081; 5368                                                                                                                                                                                                     |
| Infectious Diseases                 |                                                                                                                                                                                                                                                       |
| Hepatitis C                         | 07041; 07044; 07051; 07054; 0707                                                                                                                                                                                                                      |
| HIV/AIDS                            | 043; 044; 07953; 79571; V08                                                                                                                                                                                                                           |
| Spinal Cord Injury                  |                                                                                                                                                                                                                                                       |
| Spinal Cord Injury                  | 806; 9520; 9521; 9522; 9523; 9524; 9528; 9529; 3441; 9072; 3440                                                                                                                                                                                       |
| Mental Health and Dementia          |                                                                                                                                                                                                                                                       |
| Depression                          | 311; 29682; 2962; 2963; 2969; 3004                                                                                                                                                                                                                    |
| Post-Traumatic Stress Disorder      | 30981                                                                                                                                                                                                                                                 |
| Bipolar Disorder/Manic Depression   | 2960; 2961; 2964; 2965; 2966; 2967; 29680; 29681; 29689                                                                                                                                                                                               |
| Alcohol or Drug Dependence or Abuse | 30500; 30501; 30502; 30390; 30391; 30392; 291; 30300; 30301; 30302; 292; 30580; 30581; 30582; 30590; 30591; 30592; 30460; 30461; 30462; 30480; 30481; 30482; 30490; 30491; 30492                                                                      |
| Schizophrenia                       | 295                                                                                                                                                                                                                                                   |
| Other Psychosis                     | 297; 298                                                                                                                                                                                                                                              |
| Alzheimer's Disease                 | 3310                                                                                                                                                                                                                                                  |

**Appendix Table 2. Association between mutually exclusive mental health condition groupings and proportion of costs generated by mental health care.**

The table below depicts a multivariate linear regression model in which we explored the association between mutually exclusive groups of mental health conditions and the proportion of costs generated by mental health care. In descending order, the strongest association is seen for condition groups that include serious mental illness (SMI), substance use disorder (SUD), post-traumatic stress disorder (PTSD), and then depression.

| <b>Characteristics</b>              | <b>Coefficient</b> | <b>95% CI</b> |
|-------------------------------------|--------------------|---------------|
| <b>Mental health groups*</b>        |                    |               |
| All 4 conditions                    | .47                | .45–.48       |
| SMI + SUD + PTSD                    | .44                | .42–.45       |
| SMI+ SUD + depression               | .42                | .41–.44       |
| SMI + PTSD + depression             | .37                | .35–.39       |
| SUD + PTSD + depression             | .42                | .40–.43       |
| SMI + SUD                           | .42                | .40–.43       |
| SMI + PTSD                          | .29                | .27–.31       |
| SMI + depression                    | .29                | .28–.31       |
| SUD + PTSD                          | .32                | .30–.34       |
| SUD + depression                    | .31                | .29–.33       |
| PTSD + depression                   | .20                | .19–.22       |
| SMI alone                           | .31                | .30–.33       |
| SUD alone                           | .16                | .14–.18       |
| PTSD alone                          | .11                | .10–.12       |
| Depression alone                    | .07                | .06–.07       |
| <b>Age</b>                          | .00                | .00–.00       |
| <b>Male</b>                         | .00                | -.01–.00      |
| <b>Race/ethnicity*</b>              |                    |               |
| Black, non-Hispanic                 | .02                | .01–.02       |
| Hispanic                            | .00                | -.01–.01      |
| Other                               | .02                | .00–.03       |
| Unknown                             | -.03               | -.04– -.02    |
| <b>Marital status*</b>              |                    |               |
| Single                              | .03                | .03–.04       |
| Separated/divorced/widowed          | .01                | .00–.01       |
| <b>Insurance status*</b>            |                    |               |
| Major medical/HMO/PPO/Champus/Indem | .02                | .01–.02       |
| Medicare/Medicaid supplemental      | .02                | .01–.02       |
| All other                           | .00                | -.01–.01      |
| Homeless                            | .23                | .21–.24       |

\*Comparison group is “No mental health condition” for Mental health groups; “White, non-Hispanic” for Race/ethnicity; “Married” for Marital status; and “No insurance” for Insurance status. The regression also adjusted for the 27 chronic medical conditions listed in Table 2 and the footnote to Table 2.

**Appendix Table 3. Baseline demographic characteristics of alternative groupings of mutually exclusive diagnoses**

| Characteristics                         | SMI + any comorbid conditions |      | SUD + PTSD and/or depression |      | PTSD + depression |      | SMI alone |      | SUD alone |      | PTSD alone |      | Depression alone |      | P*     |
|-----------------------------------------|-------------------------------|------|------------------------------|------|-------------------|------|-----------|------|-----------|------|------------|------|------------------|------|--------|
|                                         | n                             | %    | n                            | %    | n                 | %    | n         | %    | n         | %    | n          | %    | n                | %    |        |
| Total number of patients                | 21,295                        | 8.1  | 26,614                       | 10.2 | 13,089            | 5.01 | 11,824    | 4.5  | 13,156    | 5.0  | 10,736     | 4.1  | 27,665           | 10.6 | —      |
| Age, (M±SD)                             | 53.8±11.4                     |      | 52.9±12.5                    |      | 58.8±10.7         |      | 61.4±12.0 |      | 57.5±9.3  |      | 62.6±11.8  |      | 63.5±12.4        |      | < .001 |
| Male                                    | 19,080                        | 89.6 | 25,291                       | 95   | 11,576            | 88.4 | 10,910    | 92.3 | 12,966    | 98.6 | 10,407     | 96.9 | 25,323           | 91.5 | < .001 |
| Race/ ethnicity                         |                               |      |                              |      |                   |      |           |      |           |      |            |      |                  |      | < .001 |
| White, non-Hispanic                     | 13,133                        | 61.7 | 15,719                       | 59.1 | 9,432             | 72.1 | 8,082     | 68.4 | 7,138     | 54.3 | 7,574      | 70.5 | 21,121           | 76.3 | —      |
| Black, non-Hispanic                     | 6,246                         | 29.3 | 8,406                        | 31.6 | 2,140             | 16.3 | 2,794     | 23.6 | 4,840     | 36.8 | 2,004      | 18.7 | 4,002            | 14.5 | —      |
| Hispanic                                | 1,294                         | 6.1  | 1,428                        | 5.4  | 953               | 7.3  | 638       | 5.4  | 613       | 4.7  | 710        | 6.6  | 1,650            | 6    | —      |
| Other                                   | 348                           | 1.6  | 475                          | 1.8  | 317               | 2.4  | 176       | 1.5  | 177       | 1.35 | 251        | 2.3  | 361              | 1.3  | —      |
| Unknown                                 | 274                           | 1.3  | 586                          | 2.2  | 247               | 1.9  | 134       | 1.1  | 388       | 2.9  | 197        | 1.8  | 531              | 1.9  | —      |
| <b>Marital status</b>                   |                               |      |                              |      |                   |      |           |      |           |      |            |      |                  |      | < .001 |
| Single                                  | 5,677                         | 26.7 | 5,736                        | 21.6 | 1,222             | 9.3  | 4,295     | 36.3 | 2,931     | 22.3 | 859        | 8    | 2,985            | 10.8 | —      |
| Married                                 | 4,750                         | 22.3 | 5,720                        | 21.5 | 7,226             | 55.2 | 2,770     | 23.4 | 2,428     | 18.5 | 6,423      | 59.8 | 12,619           | 45.6 | —      |
| Separated/ divorced/ widowed            | 10,868                        | 51   | 15,158                       | 56.9 | 4,641             | 35.5 | 4,759     | 40.3 | 7,797     | 59.3 | 3,454      | 32.2 | 12,061           | 43.6 | —      |
| <b>Insurance</b>                        |                               |      |                              |      |                   |      |           |      |           |      |            |      |                  |      | < .001 |
| None                                    | 12,799                        | 60.1 | 19,803                       | 74.4 | 6,247             | 47.7 | 5,346     | 45.2 | 9,792     | 74.4 | 4,812      | 44.8 | 11,433           | 41.3 | —      |
| Major medical/ HMO/ PPO/ Champus/ Indem | 1,156                         | 5.4  | 1,650                        | 6.2  | 1,604             | 12.2 | 583       | 4.9  | 559       | 4.2  | 1,165      | 10.8 | 2,383            | 8.6  | —      |
| Medicare/ Medicaid supplemental         | 6,688                         | 31.4 | 4,343                        | 16.3 | 4,856             | 37.1 | 5,649     | 47.8 | 2,481     | 18.9 | 4,525      | 42.2 | 13,151           | 47.5 | —      |
| All other                               | 652                           | 3.1  | 818                          | 3.1  | 382               | 2.9  | 246       | 2.1  | 324       | 2.5  | 234        | 2.2  | 698              | 2.5  | —      |
| <b>Homeless</b>                         | 9,103                         | 42.7 | 13,514                       | 50.8 | 1,165             | 8.9  | 1,583     | 13.4 | 4,950     | 37.6 | 562        | 5.2  | 2,095            | 7.6  | < .001 |

\*P-values are for ANOVA and  $\chi^2$  tests analyzing differences between patients in each of the five diagnostic groups.

**Appendix Table 4. Predicted inpatient and outpatient utilization for alternative groupings of mutually exclusive diagnoses**

| <b>Utilization categories</b>           | <b>SMI + any comorbid conditions</b> | <b>SUD + PTSD and/or Dep</b> | <b>PTSD + Dep</b> | <b>SMI alone</b> | <b>SUD alone</b> | <b>PTSD alone</b> | <b>Depression alone</b> |
|-----------------------------------------|--------------------------------------|------------------------------|-------------------|------------------|------------------|-------------------|-------------------------|
| <b>Inpatient utilization</b>            |                                      |                              |                   |                  |                  |                   |                         |
| Number of stays                         | 2.5*                                 | 2.5*                         | 1.6               | 1.8*             | 2.1*             | 1.5*              | 1.8*                    |
| Cumulative LOS behavioral               | 14.0*                                | 9.4*                         | 4.5*              | 14.0*            | 2.2              | 2.8*              | 2.5*                    |
| Cumulative LOS residential/ domiciliary | 7.9*                                 | 20.2*                        | 5.0               | 2.0*             | 17.9*            | 5.3               | 4.7                     |
| Cumulative LOS medical/ surgical        | 6.2*                                 | 7.1*                         | 6.5*              | 6.5*             | 10.0*            | 6.8*              | 8.8                     |
| Cumulative LOS long term care           | 15.7*                                | 12.0                         | 15.1*             | 34.8*            | 9.9*             | 17.4*             | 14.4*                   |
| <b>Outpatient utilization</b>           |                                      |                              |                   |                  |                  |                   |                         |
| Mental health visits                    | 43.0*                                | 40.8*                        | 22.9*             | 29.8*            | 21.1*            | 14.1*             | 9.5*                    |
| ER visits                               | 2.9*                                 | 2.6*                         | 1.9               | 2.1*             | 2.3*             | 1.6*              | 2.1*                    |
| Primary care visits                     | 6.5*                                 | 6.5*                         | 6.8*              | 5.5*             | 5.7*             | 6.1*              | 6.5*                    |
| Subspecialty visits                     | 3.4*                                 | 3.6*                         | 5.1*              | 3.4*             | 3.9*             | 5.3*              | 5.1*                    |

\*Values are statistically significant ( $p < .001$ ), using “No mental health condition” as the comparison group.

**Appendix Table 5. Percent of costs generated by mental health care for alternative groupings of mutually exclusive diagnoses**

| <b>Cost categories</b>                                      | <b>SMI + any comorbid conditions</b> | <b>SUD + PTSD and/or Dep</b> | <b>PTSD + Dep</b> | <b>SMI alone</b> | <b>SUD alone</b> | <b>PTSD alone</b> | <b>Depression alone</b> |
|-------------------------------------------------------------|--------------------------------------|------------------------------|-------------------|------------------|------------------|-------------------|-------------------------|
|                                                             | <b>\$ or %</b>                       | <b>\$ or %</b>               | <b>\$ or %</b>    | <b>\$ or %</b>   | <b>\$ or %</b>   | <b>\$ or %</b>    | <b>\$ or %</b>          |
| <b>Inpatient costs</b>                                      |                                      |                              |                   |                  |                  |                   |                         |
| Behavioral Residential/domiciliary                          | \$16,471*                            | \$10,041*                    | \$5,529*          | \$17,146*        | \$1,699          | \$3,328*          | \$3,011*                |
| Medical/surgical                                            | \$2,960*                             | \$7,526*                     | \$1,894           | \$736*           | \$6,693*         | \$1,997           | \$1,742                 |
| Long term care                                              | \$17,175*                            | \$19,413*                    | \$19,782*         | \$18,946*        | \$29,207         | \$21,814*         | \$26,622*               |
| Other                                                       | \$5,623                              | \$5,079*                     | \$6,160           | \$8,675          | \$5,199*         | \$6,631           | \$7,200                 |
| Other                                                       | \$986*                               | \$1,112*                     | \$1,626*          | \$1,546*         | \$1,701*         | \$2,502*          | \$2,878*                |
| <b>Outpatient costs</b>                                     |                                      |                              |                   |                  |                  |                   |                         |
| Behavioral Medical/surgical                                 | \$11,277*                            | \$7,779*                     | \$5,870*          | \$10,811         | \$3,552*         | \$3,323*          | \$2,704*                |
| Diagnostic                                                  | \$8,089*                             | \$8,379*                     | \$10,165*         | \$7,787*         | \$9,274*         | \$11,126*         | \$11,399*               |
| Pharmacy                                                    | \$2,838                              | \$3,202*                     | \$2,953           | \$2,315*         | \$3,158*         | \$2,903           | \$2,942*                |
| Other                                                       | \$4,134*                             | \$5,093*                     | \$3,049           | \$4,478          | \$2,814*         | \$4,709           | \$5,203                 |
| Other                                                       | \$1,529                              | \$1,660                      | \$2,089           | \$1,753          | \$1,342          | \$2,428*          | \$1,956                 |
| <b>Mental health costs</b>                                  | <b>\$30,708</b>                      | <b>\$25,346</b>              | <b>\$13,294</b>   | <b>\$28,693</b>  | <b>\$11,944</b>  | <b>\$8,649</b>    | <b>\$7,457</b>          |
| <b>Total costs</b>                                          | <b>\$71,081</b>                      | <b>\$69,284</b>              | <b>\$59,117</b>   | <b>\$74,191</b>  | <b>\$64,637</b>  | <b>\$60,764</b>   | <b>\$65,658</b>         |
| <b>Percent of costs generated by mental health care (%)</b> | <b>43%</b>                           | <b>37%</b>                   | <b>22%</b>        | <b>39%</b>       | <b>18%</b>       | <b>14%</b>        | <b>11%</b>              |

\*Values are statistically significant ( $p < .001$ ), using "No mental health condition" as the comparison group.
